# Supplementary material
Source: HighWire-hosted journal article supplement (https://jnm.snmjournals.org/highwire/filestream/94426/field_highwire_adjunct_files/0/110163_Supplemental_Data.pdf)

## Supplemental Figure 1

Representative Logan plots from the analyzed brain regions in APP23 mouse brain at 18 months.

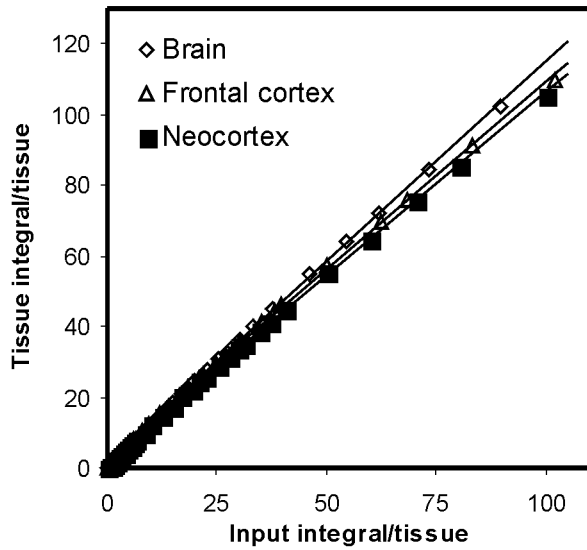

## Supplemental Figure 2

*Ex vivo* [ $^{11}\text{C}$ ]PIB autoradiograms from cerebellar sections of APP23, Tg2576 and APP<sub>swe</sub>-PS1<sub>dE9</sub> mice and wild type control mice brain.

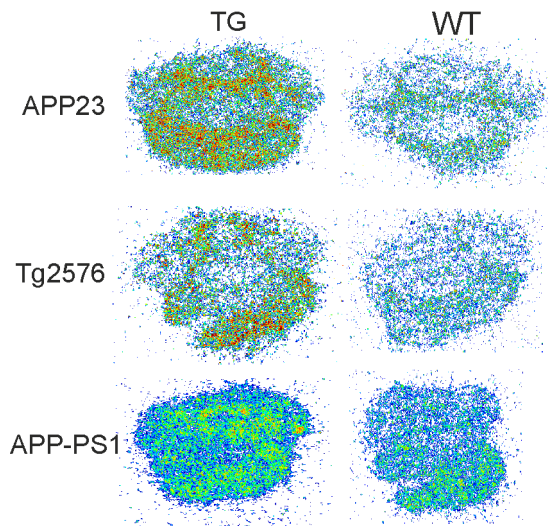

### Supplemental Figure 3

Thioflavin-S staining of cerebellar sections from APP23, Tg2576, APP<sub>swe</sub>-PS1<sub>dE9</sub> brain.

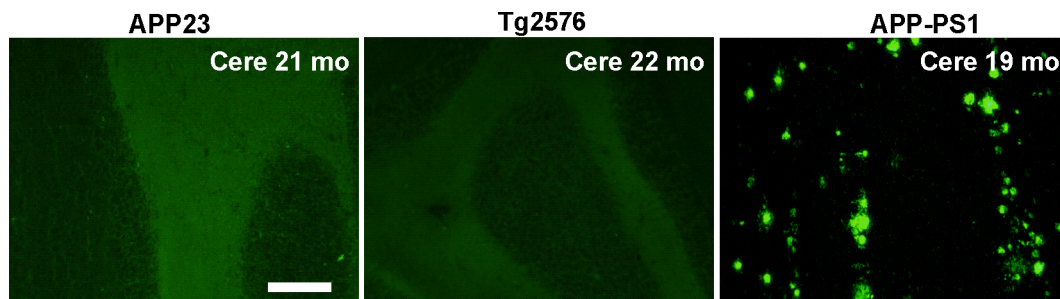

Scale bar: 200  $\mu$ m.

## Supplemental Figure 4

Anti-A $\beta_{N3pE}$  –immunostaining in cortical sections of APP23, Tg2576 and APP<sub>swe</sub>-PS1<sub>dE9</sub> mice.

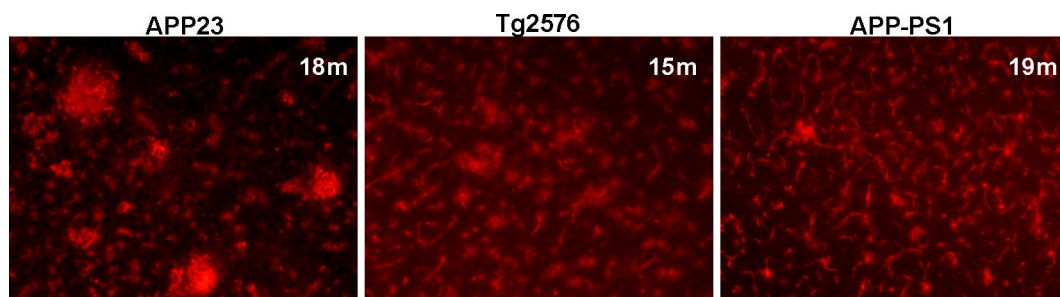

Supplement: 110163_Supplemental_Data.pdf [file 110163_Supplemental_Data.pdf]
